# Supplementary material for: Loop-Mediated Isothermal Amplification for Influenza A (H5N1) Virus
Source: PubMed Central journal article supplement (PMC2792861; doi:10.3201/eid1306.061572), 2007-06

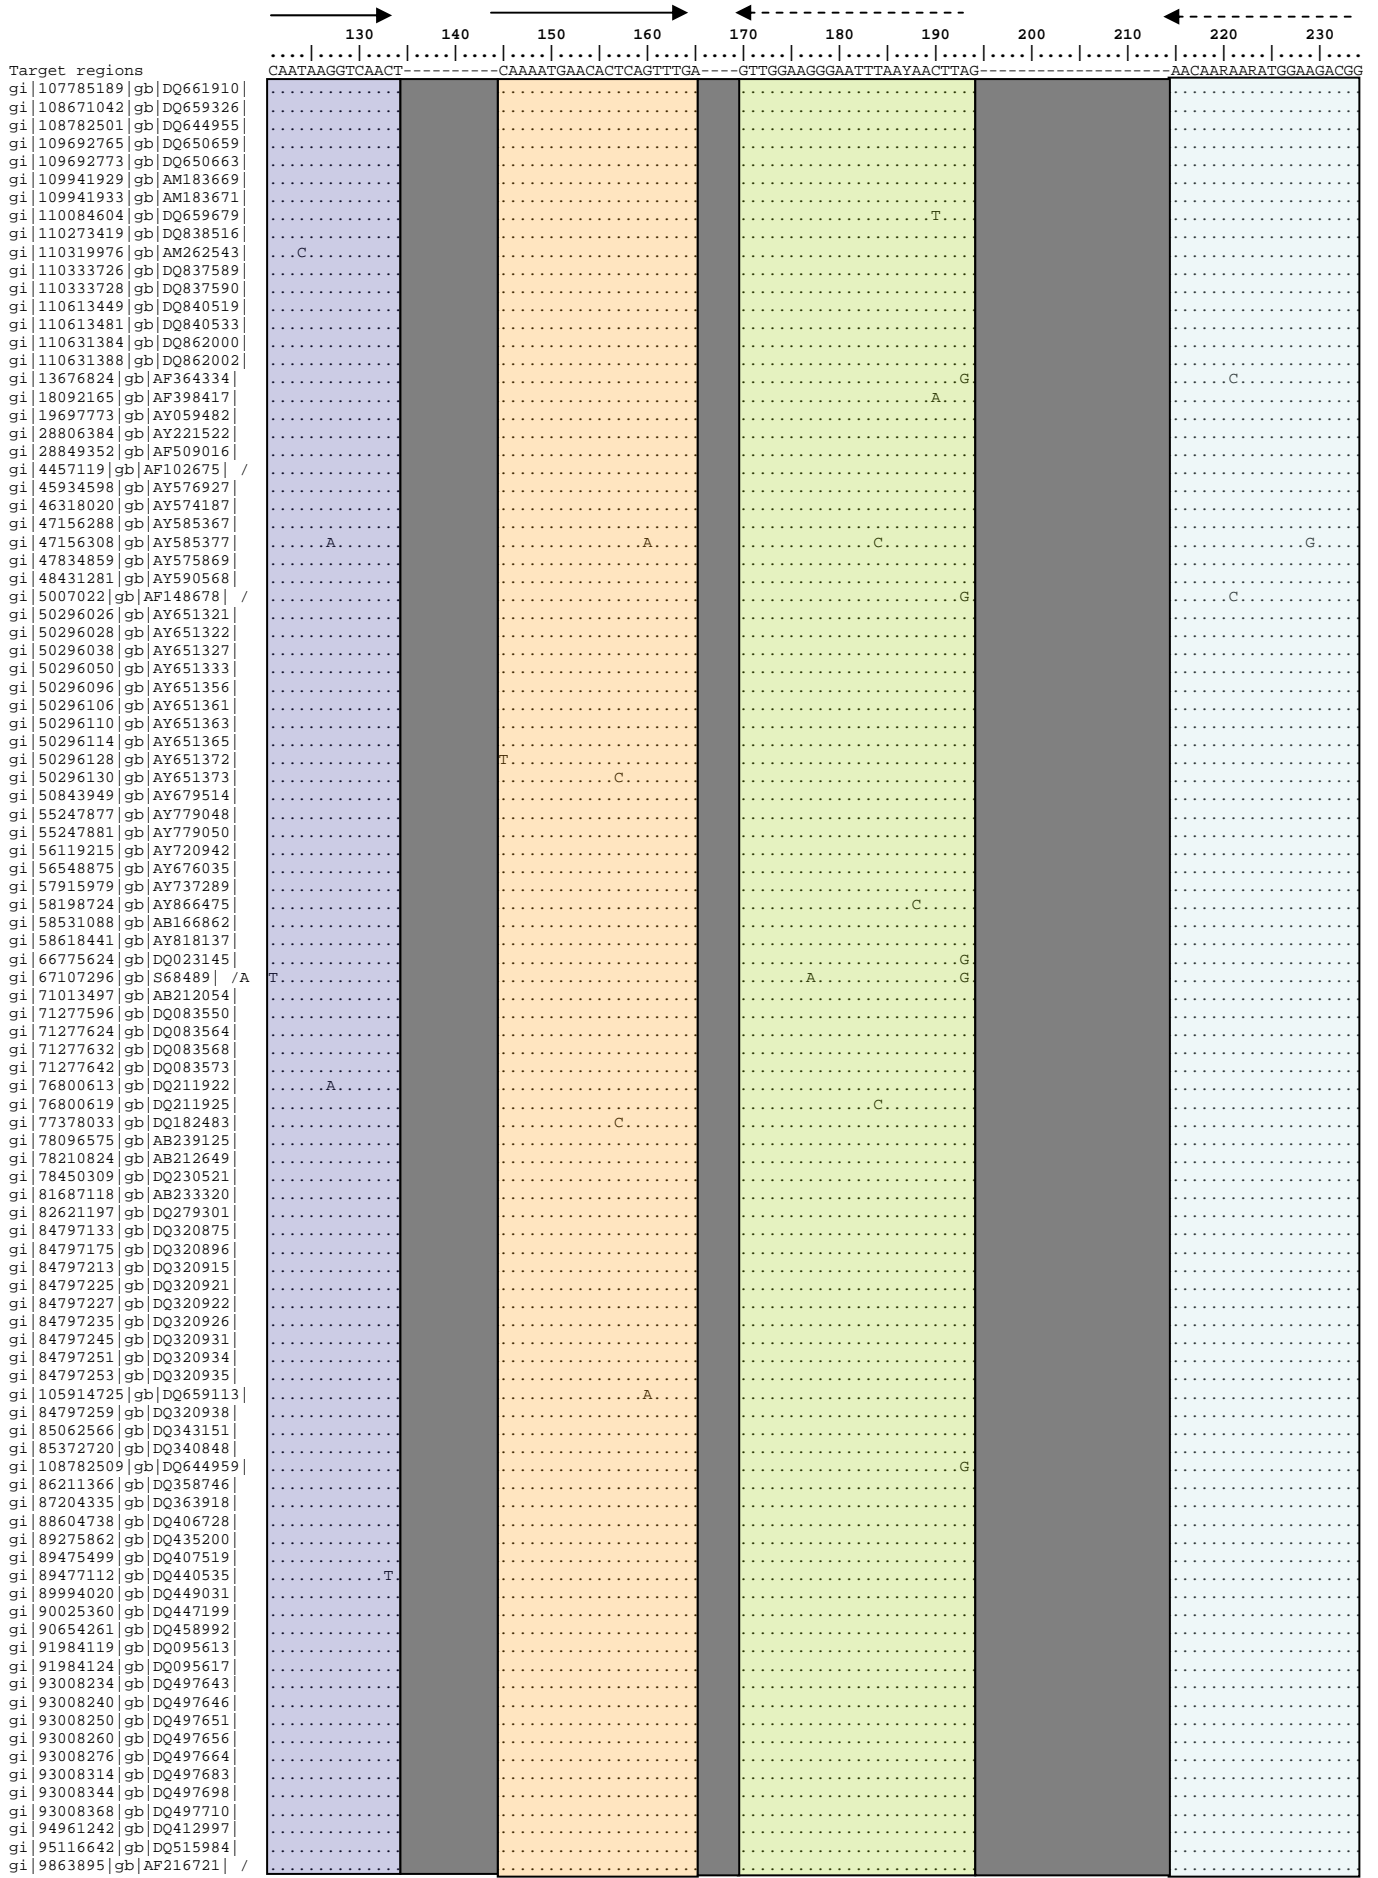

Supplement: 06-1572_appF3-s3.pdf [file 06-1572_appF3-s3.pdf]
