# Supplementary material for: Loop-Mediated Isothermal Amplification for Influenza A (H5N1) Virus
Source: Emerg Infect Dis. 2007 Jun;13(6):899–901. doi: 10.3201/eid1306.061572 (PMC2792861; doi:10.3201/eid1306.061572)
Supplement: Appendix Figure 2 — Target regions [file 06-1572_appF2-s2.pdf]

Genomic map of the F3-F1 region showing the F3, F2, LPF, F1c, and B1 regions. The map includes a scale from 10 to 120 kb and a detailed sequence alignment of the F3, F2, LPF, F1c, and B1 regions. The alignment shows the F3, F2, LPF, F1c, and B1 regions with their respective sequences and orientations.

Diagram illustrating the LPB (Left Promoter Box) and B2c (Bacterial Two-Component) regions. The LPB region is shown with a scale from 130 to 170, and the B2c region is shown with a scale from 180 to 230. The diagram includes a DNA sequence with various mutations and a corresponding protein sequence. The LPB region contains a -35 box (CAATAAGGTCACCT) and a -10 box (GTTTGAAGGGGAATTTAA). The B2c region contains a -35 box (AACAARAARATGGAGACGG) and a -10 box (GTTTGAAGGGGAATTTAA). The diagram also shows a scale from 130 to 230 at the top.

| Primer       | Sequence (5' to 3')                                                    |
|--------------|------------------------------------------------------------------------|
| F3           | TATAGAGGG <b>R</b> GGATGGCA                                            |
| B3c          | CCGTCTCCAT <b>Y</b> TTT <b>Y</b> TTGTT                                 |
| F1P (F1c+F2) | TCTTTGTCTGCAGCGTAY <b>CC</b> TTTTGGGAATGGTAGATGGTTGG                   |
| B1P (B1+B2c) | ATGGAGTCACCAATAAGGTCAACT <b>TTTT</b> TCTAAGT <b>RT</b> TAAATTCCTTCCAAC |
| LPF          | GCTC <b>RT</b> TGCTATGGTGGTA                                           |
| LPB          | CAAAATGAACACTCAGTTTGA                                                  |
